# Supplementary material for: Rescue of nonsense mutations by amlexanox in human cells
Source: PubMed Central journal article supplement (PMC3562214; doi:10.1186/1750-1172-7-58), 2012-08-31
Supplement: 1750-1172-7-58-S1.pdf [file 1750-1172-7-58-S1.pdf]

| well | reading 1 | reading 2 | reading 3 | well | average readings 1-3 |
|------|-----------|-----------|-----------|------|----------------------|
| A01  | 18377     | 18324     | 18647     | A01  | 18449.3333           |
| A02  | 14590     | 15288     | 15436     | A02  | 15104.6667           |
| A03  | 18813     | 18918     | 19145     | A03  | 18958.6667           |
| A04  | 19921     | 20488     | 20890     | A04  | 20433                |
| A05  | 15384     | 15235     | 15480     | A05  | 15366.3333           |
| A06  | 20654     | 21893     | 22138     | A06  | 21561.6667           |
| A07  | 26954     | 27670     | 28499     | A07  | 27707.6667           |
| A08  | 14703     | 15279     | 15375     | A08  | 15119                |
| A09  | 27504     | 29031     | 29040     | A09  | 28525                |
| A10  | 39886     | 40863     | 41867     | A10  | 40872                |
| A11  | 16693     | 17469     | 17801     | A11  | 17321                |
| A12  | 14939     | 15750     | 15995     | A12  | 15561.3333           |
| B01  | 35471     | 36221     | 37478     | B01  | 36390                |
| B02  | 15043     | 15349     | 15715     | B02  | 15369                |
| B03  | 14913     | 15035     | 15689     | B03  | 15212.3333           |
| B04  | 17495     | 17714     | 18019     | B04  | 17742.6667           |
| B05  | 22460     | 23246     | 23351     | B05  | 23019                |
| B06  | 18673     | 18848     | 19703     | B06  | 19074.6667           |
| B07  | 12321     | 12426     | 12766     | B07  | 12504.3333           |
| B08  | 27338     | 27286     | 27260     | B08  | 27294.6667           |
| B09  | 20323     | 20576     | 20864     | B09  | 20587.6667           |
| B10  | 20113     | 20314     | 20349     | B10  | 20258.6667           |
| B11  | 13691     | 14119     | 14502     | B11  | 14104                |
| B12  | 27975     | 29214     | 30959     | B12  | 29382.6667           |
| C01  | 19939     | 20628     | 21344     | C01  | 20637                |
| C02  | 18045     | 18246     | 18839     | C02  | 18376.6667           |
| C03  | 17661     | 18036     | 18272     | C03  | 17989.6667           |
| C04  | 17085     | 17260     | 17975     | C04  | 17440                |
| C05  | 20157     | 20227     | 21003     | C05  | 20462.3333           |
| C06  | 29083     | 29642     | 30261     | C06  | 29662                |
| C07  | 18830     | 19136     | 19590     | C07  | 19185.3333           |
| C08  | 20000     | 20541     | 21169     | C08  | 20570                |
| C09  | 16710     | 17251     | 18028     | C09  | 17329.6667           |
| C10  | 19180     | 19817     | 20698     | C10  | 19898.3333           |
| C11  | 30462     | 30872     | 31658     | C11  | 30997.3333           |
| C12  | 32085     | 34127     | 34895     | C12  | 33702.3333           |
| D01  | 17766     | 18124     | 19005     | D01  | 18298.3333           |
| D02  | 23516     | 24005     | 24790     | D02  | 24103.6667           |
| D03  | 27652     | 28874     | 30994     | D03  | 29173.3333           |
| D04  | 19913     | 20157     | 20698     | D04  | 20256                |
| D05  | 18857     | 19014     | 19555     | D05  | 19142                |
| D06  | 26021     | 26597     | 27844     | D06  | 26820.6667           |
| D07  | 15384     | 15689     | 16099     | D07  | 15724                |
| D08  | 21710     | 22312     | 22670     | D08  | 22230.6667           |
| D09  | 18150     | 18612     | 19450     | D09  | 18737.3333           |
| D10  | 14869     | 14721     | 15201     | D10  | 14930.3333           |
| D11  | 28246     | 29267     | 31448     | D11  | 29653.6667           |
| D12  | 18289     | 18464     | 19267     | D12  | 18673.3333           |

|     |       |       |       |          |            |
|-----|-------|-------|-------|----------|------------|
| E01 | 18822 | 18586 | 18918 | E01      | 18775.3333 |
| E02 | 18385 | 19014 | 19947 | E02      | 19115.3333 |
| E03 | 17016 | 17748 | 18473 | E03      | 17745.6667 |
| E04 | 23944 | 24511 | 25785 | E04      | 24746.6667 |
| E05 | 23202 | 23577 | 24598 | E05      | 23792.3333 |
| E06 | 17679 | 17783 | 18289 | E06      | 17917      |
| E07 | 29110 | 29424 | 30165 | E07      | 29566.3333 |
| E08 | 20296 | 20907 | 21815 | E08      | 21006      |
| E09 | 21501 | 21946 | 22661 | E09      | 22036      |
| E10 | 20427 | 20864 | 21457 | E10      | 20916      |
| E11 | 23324 | 24782 | 25515 | E11      | 24540.3333 |
| E12 | 22827 | 22844 | 23455 | E12      | 23042      |
| F01 | 26483 | 25829 | 26230 | F01      | 26180.6667 |
| F02 | 22652 | 22757 | 23464 | F02      | 22957.6667 |
| F03 | 25078 | 25017 | 25750 | F03      | 25281.6667 |
| F04 | 18743 | 18979 | 19153 | F04      | 18958.3333 |
| F05 | 24293 | 24328 | 25192 | F05      | 24604.3333 |
| F06 | 29319 | 29764 | 31553 | F06      | 30212      |
| F07 | 22469 | 22836 | 24319 | F07      | 23208      |
| F08 | 28734 | 29284 | 30916 | F08      | 29644.6667 |
| F09 | 25925 | 24738 | 26099 | F09      | 25587.3333 |
| F10 | 18342 | 18499 | 19502 | F10      | 18781      |
| F11 | 24816 | 25357 | 26719 | F11      | 25630.6667 |
| F12 | 24747 | 25619 | 27103 | F12      | 25823      |
| G01 | 36282 | 36544 | 37897 | G01      | 36907.6667 |
| G02 | 26597 | 27705 | 29607 | G02      | 27969.6667 |
| G03 | 21605 | 22251 | 23368 | G03      | 22408      |
| G04 | 21789 | 22862 | 24249 | G04      | 22966.6667 |
| G05 | 13290 | 13525 | 14153 | G05      | 13656      |
| G06 | 20218 | 20942 | 21981 | G06      | 21047      |
| G07 | 72504 | 65619 | 61343 | G07      | 66488.6667 |
| G08 | 16012 | 16474 | 17007 | G08      | 16497.6667 |
| G09 | 24241 | 24729 | 26300 | G09      | 25090      |
| G10 | 15017 | 15366 | 16003 | G10      | 15462      |
| G11 | 21981 | 22321 | 23385 | G11      | 22562.3333 |
| G12 | 34877 | 37085 | 39109 | G12      | 37023.6667 |
| H01 | 13778 | 14703 | 15742 | H01      | 14741      |
| H02 | 14180 | 14921 | 15698 | H02      | 14933      |
| H03 | 34520 | 34179 | 35130 | H03      | 34609.6667 |
| H04 | 30349 | 32687 | 34127 | H04      | 32387.6667 |
| H05 | 9127  | 9729  | 10026 | H05      | 9627.33333 |
| H06 | 22155 | 23621 | 24712 | H06      | 23496      |
| H07 | 22173 | 23054 | 24328 | H07      | 23185      |
| H08 | 23743 | 24991 | 26213 | H08      | 24982.3333 |
| H09 | 23394 | 23769 | 24982 | H09      | 24048.3333 |
| H10 | 32818 | 34415 | 36500 | H10      | 34577.6667 |
| H11 | 37137 | 38193 | 40497 | H11      | 38609      |
| H12 | 19066 | 20078 | 21413 | H12      | 20185.6667 |
|     |       |       |       | average: | 23056.7049 |

Table S4: Measures of the luciferase activity of plate figure 1 with MS2-UPF3X strain.  
Reading 2 was performed 2 minutes after reading 1  
and reading 3 was performed 2 minutes after reading 2.  
Amlexanox position (G07) is highlight
