# Supplementary material for: Rescue of nonsense mutations by amlexanox in human cells
Source: PubMed Central journal article supplement (PMC3562214; doi:10.1186/1750-1172-7-58), 2012-08-31
Supplement: 1750-1172-7-58-S3.pdf [file 1750-1172-7-58-S3.pdf]

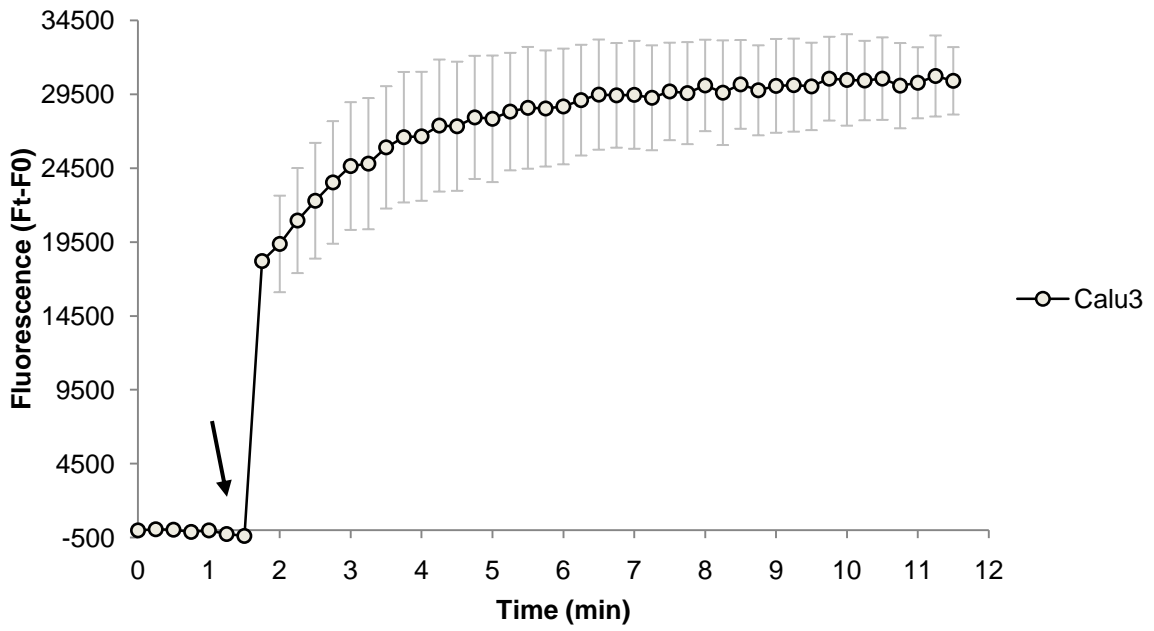

Figure S2
